# Supplementary material
Source: publisher figshare collection journal article supplement (https://geolsoc.figshare.com/ndownloader/files/5422643)
Supplement: Supplementary file 1 [file 5422643]

								Major elements															Trace elements
East Papuan samples																							* denotes analysis by XRF remainded by LA-ICP-MS
																							numbers denote determining isotope
Prefix 33	field No	rock type		outcrop	localoty	group	petrography	SiO2	TiO2	Al2O3	Fe2O3	FeO	MnO	MgO	CaO	Na2O	K2O	P2O5	H2O+	H2O-	CO2	total	Cs133	Ba137	Ba*	Rb85	Rb*	Sr88	Sr*	Pb208	Pb*	Th232	Th*	U238	U*	Zr90	Zr*	Nb93	Nb*	Hf178	Ta181	Y89	Y*	La139	La*	Ce140	Ce*	Pr141	Nd146
603	3689E	Andesite		agglomerate clast	Panaroa Island	Calvados & Egum	(ll°7’S 152°30’E) Plag An cpx; minor opx	58.7	0.71	14.6	1.7	4.05	0.09	6.45	6.15	3	2.15	0.22	1.3	0.36	0.15	99.63			613		55		914		30		9		2								18		18		40
604	36890	Porphyritic andesite		agglomerate clast	Panaroa Island	Calvados & Egum	(ll°7’S 152°30’E) Phenocrysts — hblde cpx groundmass Plag (An hblde cpx opx biot opq.	59.2	0.82	15	3.9	1.75	0.09	4.5	5.75	3.2	2.65	0.32	1.26	1.26	0.05	99.75			925		60		315		34		8		2								22		21		52
605	3689A	Dacite		agglomerate clast	Panaroa Island	Calvados & Egum	(11°7’S l52°30’E). Plag (An cpx; minor opx opq.	63.5	0.48	16.7	1.55	2.2	0.07	2.2	4.2	3.5	3.1	0.25	1.63	0.19	0.09	99.66			915		99		1250		37		13		3								18		32		63
606	3681A	Porphyritic dacite		dyke	Moturina Island	Calvados & Egum	(1l°5’S 152°34’E). phenocrysts - hblde plag (altered) groundmass - cpx hblde plag.	65.4	0.48	16.5	1.2	2.25	0.06	2.8	3.2	4.05	2.3	0.18	1	0.12	0.05	99.59			766		73		1109		33		8		3								14		17		37
607	223	Porphyritic aridesite	33607		Egum Islands	Calvados & Egum	(9°22’S 151°57’E). Phenocrysts - plag (An cpx hblde (opq pseudo morphs); minor ol (pseudomorphs).	56.63	0.6	14.16	3.54	1.91	0.12	7.79	6.81	3.76	2.05	0.28	0.71	1.37	0.13	99.86	0.98	995.28	1116	40.40	41	711.85	1126	8.28	12	7.91	5	1.44	2	257.31	124	16.61	3	7.85	1.19	28.92	13	66.91	34	83.40	49	11.62	49.38
608	217	Porphyritic andesite	33608		Egum Islands	Calvados & Egum	(9°22’S 151°57’E). Phenocrysts - play (An opq (after hblde and biot); minor cpx.	57.92	0.61	15.84	3.28	1.83	0.1	5.42	6.47	4.2	2.43	0.29	0.4	0.63	0.12	99.54	0.95	908.77	960	32.22	51	1215.66	1216	11.95	18	10.30	11	2.27	3	129.11	149	4.76	4	4.16	0.41	12.00	11	49.08	26	51.56	54	6.15	25.09
609	218	Porphyritic andesite	33609		Egum Islands	Calvados & Egum	(9°22’S 151°57’E). Phenocrysts - play (An opq (after hblde and biot); minor cpx biot (fresh).	59.02	0.65	15.78	4.48	1	0.07	3.89	6.03	4.44	1.96	0.33	0.6	1.12	0.17	99.54	0.65	759.26	977	28.13	42	973.00	999	12.97	16	7.69	4	1.50	1	123.05	137	4.08	2	3.91	0.31	13.47	18	48.68	31	52.83	40	6.85	29.01
610	213	Porphyritic andesite	33610		Nasakori Island	Calvados & Egum	(9°23tS 151°58’E). Phenocrysts - play ‘ CpX opq (after hblde and biot); minor opx.	61.09	0.56	15.41	2.77	1.5	0.06	4.53	6.41	4.18	2.27	0.3	0.32	0.32	0.03	99.75	0.68	844.62	1055	25.93	39	1219.91	1257	10.16	10	9.53	6	2.02	2	123.39	146	4.32	5	3.92	0.34	11.21	10	49.21	33	53.01	50	6.57	26.82
611	3731	Porphyritic basalt	33611			Normanby Is	(9°53’S 150°52’E). Phenocrysts - ol cpx; groundmass — play cpx opq.	48.8	1.68	13.7	4.35	5.3	0.15	9.65	8.05	2.5	2.25	0.84	1.28	1.04	0.07	99.66	0.96	995.60	1327	35.71	56	700.90	660	6.77	9	7.66	6	1.42	1	248.78	268	16.01	14	7.53	1.11	28.16	25	65.63	51	81.95	87	11.39	48.89
612	3793A	Basalt	33612	float		Normanby Is	(9°50’S 150°55’E). Phenocrysts — play cpx. Groundmass — plag cpx opq.	49.6	1.75	17.4	3.4	5.4	0.18	5.97	9.75	3.85	0.75	0.36	0.98	0.32	0.05	99.76	0.13	245.76	333	7.16	11	457.22	462	3.79	6	1.63	0	0.45	1	158.78	178	5.89	4	4.35	0.48	34.35	31	39.65	21	31.45	35	4.83	23.10
613	3733B	Basalt	33613	agglomerate clast		Normanby Is	(9°55’S 150°53’E). Play (An opx ol.	51.9	2	16.5	4	4.5	0.13	4.2	7.95	4.05	1.61	0.74	1.07	1.69	0.06	100.4	0.48	562.59	699	17.97	26	821.94	807	8.23	10	5.80	3	1.01	0	176.25	98	8.92	7	5.33	0.70	29.60	26	51.98	32	62.30	59	8.31	37.97
614	275	Porphyritic basalt	33614	float		Normanby Is	(9°58’S 150°53’E). Pheno crysts - play (An ol cpx; groundmass - play CpX opq.	51.91	1.93	15.53	2.51	6.71	0.15	5.88	8.33	3.59	1.57	0.62	0.35	0.39	0.07	99.54			460		30		669		8		3		1		182		7				28		22		54
615	3736	Basaltic andesite	33615	float		Normanby Is	(9°57’S 150°55’E). Pheno— crysts - play (An cpx. Groundmass - play cpx opq.	53.6	1.49	16.9	2.45	5.25	0.14	3.6	7.3	3.7	1.58	0.49	1.34	1.04	0.78	99.66	6.45	681.67	846	25.83	38	815.41	786	9.97	12	6.97	4	1.41	1	183.23	202	9.04	8	5.43	0.71	28.06	24	53.09	33	61.92	69	8.05	35.51
616	3793B	Basaltic andesite	33616	float		Normanby Is	(9°50’S 150°55’E). Pheno crysts — oL cpx play (An Groundmass — play fine interstitial material.	54.1	1.12	14.7	0.69	6.45	0.14	8.05	7.7	3.05	1.58	0.31	0.71	0.77	0.42	99.79	1.38	488.49	608	26.57	41	628.89	620	8.38	11	6.24	3	1.22	1	150.43	172	6.73	6	4.57	0.55	22.54	21	44.26	24	45.82	34	5.86	25.56
617	272	Basaltic artdesite	33617			Normanby Is	(9°53’s 150°52’E). Phenocrysts - play (An ol cpx. Some clusters. Groundmass -play opq.	54.37	1.2	15.37	2.12	4.82	0.11	6.74	7.03	3.5	2.12	0.36	0.66	0.78	0.32	99.5	0.91	563.31	775	25.80	41	618.93	613	8.63	15	7.26	6	1.31	2	175.62	198	8.75	8	5.23	0.67	23.27	20	47.22	32	50.59	55	6.39	27.42
618	276	Basaltic andesite	33618	agglomerate clast		Normanby Is	(9°58’S 150°53’E). 01 cpx play (An opq.	54.62	1.36	16.73	2.97	3.65	0.12	4.17	7.5	4.22	2.2	0.49	0.52	0.71	0.18	99.44	0.35	734.50	704	25.00	40	804.46	803	10.05	18	7.80	8	1.56	2	211.96	245	10.11	9	6.06	0.80	26.90	25	56.22	30	69.96	68	8.91	39.14
619	3771A	Andesite	33619			Normanby Is	(9°52’S 150°52’E). Sparse phenocrysts - plag (An cpx; fine feldspathic groundmass.	56.1	1.11	15.2	3	3.3	0.12	6.05	6.35	3.55	2.1	0.41	1.36	1.16	0.05	99.86	45.46	821.91	985	22.23	33	884.41	869	14.18	15	10.78	6	1.84	2	235.58	259	9.66	8	6.89	0.73	24.56	22	58.07	41	67.36	65	8.88	37.48
620	37273	Andesite	33620			Normanby Is	(iO°i’S 150°59’E). Phenocrysts – plag (An cpx opx. Groundmass - plag glass.	58.2	1.2	17.6	1.96	3.95	0.12	2.95	6	4.1	2.15	0.33	0.55	0.75	0.08	99.94	1.63	707.96	856	36.14	54	689.88	668	13.23	16	8.80	5	1.69	1	191.40	213	6.85	6	5.83	0.54	24.86	22	49.39	31	55.14	57	7.14	30.71
621	283	Andesite	33621			Normanby Is	(9°55’S 150°53’E). Phenocrysts – plag (An cpx ol hblde (opq rims). Groundmass — plag glass.	58.7	0.92	14.99	1.74	3.72	0.08	5.57	5.76	3.28	2.81	0.37	1.2	0.48	0.06	99.68	2.05	733.35	755	40.27	67	714.25	762	12.39	20	9.20	8	1.75	1	176.84	216	6.19	5	5.50	0.54	20.74	19	49.61	29	58.52	62	7.32	30.70
622	274	Porphyritic andesite	33622			Normanby Is	(9°51’S 150°51’E). Pheriocrysts — plag (An ol cpx; minor hblde blot. Crystal clusters.	59.03	0.92	15.79	1	4.35	0.09	5.18	5.77	3.89	2.62	0.33	0.64	0.29	0.21	100.11	1.70	732.67	721	36.53	60	700.61	714	11.70	19	8.50	8	1.56	1	182.73	121	6.69	7	5.46	0.59	19.03	17	48.94	26	55.02	56	6.78	28.83
623	3730	Andesite	33623			Normanby Is	(9°50’S 150°51’E). Phenocrysts — plag (An cpx hblde (opq rims) opq (after hblde). Fine feldspathic groundmass.	59.6	0.91	15.5	2.95	2.35	0.09	4.7	5	3.65	2.8	0.28	1.36	0.62	0.05	99.86	2.26	721.39	876	43.71	67	561.29	552	13.27	16	10.25	9	1.88	2	211.28	229	8.40	7	6.35	0.72	21.98	19	50.32	34	55.93	63	6.90	28.87
624	3726B	Dacite	33624			Normanby Is	(9°51’s 150°52’E).	60.6	0.87	15.6	3.35	1.53	0.08	3.3	4.15	4.2	3	0.27	0.76	2	0.05	99.76	1.30	864.20	1046	48.96	71	560.89	600	14.87	18	11.72	7	2.15	2	241.94	263	9.60	8	7.23	0.76	24.01	21	55.41	37	65.02	66	8.05	32.72
625	270	Dacite	33625			Normanby Is	Dacite (io°i’s 150°56’E). Phenocrysts – plag 3o-35 blot. Fine feldspathic groundmass.	65.82	0.61	15.97	2.27	1.21	0.07	0.94	1.98	5.58	4.18	0.18	0.34	0.34	0.08	99.57	1.63	492.92	450	60.73	102	188.58	190	16.41	23	16.71	17	3.51	3	412.07	460	20.59	19	11.59	1.75	34.45	35	65.80	43	84.99	89	9.75	36.81
626	282	Rhyolite	33626	float		Normanby Is	(9°50’S 150°51’E). Phenocrysts of oligoclase in a fine feldspathic groundmass containing quartz.	66.1	0.78	16.81	1.66	0.85	0.02	1.01	2.41	4.79	4.17	0.28	0.44	0.35	0.02	99.69	1.65	958.93	962	69.43	113	470.57	478	17.72	22	17.14	15	3.34	3	320.20	351	11.87	11	9.32	1.05	20.43	19	61.19	37	74.38	78	8.56	32.34
627	3726A	Basaltic andesite	33627	agglomerate clast	Wamea Island	Amphlett Is	(9°15’S 150°54’E). Small phenocrysts of ol in fine feldspathic groundmass.	69.1	0.39	15.4	1.98	0.47	0.05	0.3	0.76	5.95	4.25	0.08	0.38	0.58	0.05	99.74	1.42	872.37	1111	64.31	102	86.16	97	16.16	20	14.15	15	3.36	3	434.97	502	19.19	18	11.63	1.51	36.44	34	66.25	58	87.73	97	10.41	40.04
628	127	Basaltic andesite	33628	agglomerate clast	Wawasi Island	Amphlett Is	(9°20’s 150°53’E). Sparse phenocrysts of ol in a	52.39	1.15	14.67	4.51	3.04	0.12	7.94	7.66	3.56	2.66	0.52	0.56	0.46	0.05	99.29	0.67	882.39	1160	37.65	61	1049.18	1063	17.17	28	15.63	15	2.86	2	185.57	215	7.13	7	5.39	0.55	19.15	17	64.91	54	82.58	96	10.10	41.95
629	91	Basaltic andesite		float	Wawasi Island	Amphlett Is	(9°20’S 150°53’E). Phenocrysts of ol in a feldspathic groundmass.	53.42	1.23	14.53	2.83	4.97	0.13	8.6	7.46	3.31	1.79	0.37	0.46	0.48	0.09	99.67			882		33		670		9		4		0		214		7				21		29		53
630	104	Andesite	33630	agglomerate clast	Tewara Island	Amphlett Is	(9°28’S 150°58’E). Phenocrysts - plag (An cpx ol opx hblde (opq rims). Fine glassy groundmass.	54.64	0.94	15.2	4.5	2.19	0.12	6.9	7.34	3.92	2.33	0.4	0.5	0.38	0.08	99.44	1.06	812.30	1061	25.90	41	907.40	929	13.40	0	8.86	22	1.86	8	167.67	2	7.26	196	5.05	0.58	18.72	7	57.60	44	70.10	76	8.83	37.09
631	103	Andesite	33631		Tewara Island	Amphlett Is	Tewara Island (9°28’S 150°58’E). Pheno— crysts - plag (An cpx opx ol. Groundmass - plag opq glass.	55.07	1.3	15.27	2.69	4.05	0.11	6.79	6.2	4.01	2.57	0.45	0.41	0.33	0.11	99.36	0.84	755.20	933	30.50	50	826.19	847	11.51	18	6.66	7	1.55	2	178.43	208	14.13	14	5.22	1.06	17.52	16	54.38	38	62.10	64	7.76	32.31
632	225	Andesite	33632	float	Uama Island	Amphlett Is	(9°28’S 150°57’E).01 plag cpx.	57.02	1.01	15.71	3.07	2.83	0.09	4.83	6.09	3.67	3.07	0.46	0.87	0.51	0.02	99.25	2.12	1008.95	1219	45.40	74	919.71	931	16.16	21	13.55	11	2.39	3	231.36	274	7.83	7	6.88	0.64	23.17	21	63.66	53	81.32	90	9.98	40.77
633	224	Andesite	33633	float	Uama Island	Amphlett Is	Uama Island (9°28’S 150°57’E). Phenocrysts - cpx opx ol. Groundmass — plag cpx opq.	57.79	1.09	16.49	3.46	2.57	0.09	3.71	5.71	3.92	2.82	0.41	0.94	0.65	0.01	99.66	1.92	827.40	1026	42.60	69	776.98	781	13.88	17	11.23	9	2.15	2	220.46	260	7.81	7	6.59	0.65	25.48	23	58.61	45	69.85	77	9.21	38.50
634	231	Andesite	33634		Tuboa Island	Amphlett Is	(9°13’S 150°49’E). Phenocrysts - plag (An cpx opx hblde biot. Fine grained groundmass.	58.43	0.81	14.6	3.01	3.26	0.1	6.77	5.62	3.64	2.23	0.2	0.54	0.45	0.03	99.69	0.80	662.24	837	24.73	42	546.11	558	12.00	15	10.25	9	1.87	2	147.47	175	6.27	6	4.84	0.59	17.10	15	45.84	30	45.56	45	5.80	23.70
635	229	Andesite	33635		Wawiwa Island	Amphlett Is	(9°17’S 150°44’E). Plag (An cpx opq; rare ol.	58.53	1.1	15.57	2.35	3.62	0.1	4.38	5.63	4.03	2.51	0.39	0.44	0.56	0.02	99.23	1.39	712.63	933	39.02	64	733.55	746	11.27	15	9.08	7	1.62	1	195.99	230	7.30	7	6.03	0.60	23.02	20	57.04	41	65.86	77	8.71	36.92
636	122	Andesite	33636		Watota Island	Amphlett Is	(9°18’S l50°42’E). Pheno— crysts — ol opx cox. Fine feldspathic groundmass.	58.98	0.95	15.74	4.24	1.03	0.07	3.94	4.94	4.08	3.28	0.39	1.13	0.57	0.04	99.38	2.80	1086.73	1352	48.08	82	1042.71	1065	26.36	35	19.02	15	3.70	3	210.50	250	7.90	6	6.43	0.65	18.16	16	68.55	54	86.40	84	10.42	42.58
637	90	Porphyritic andesite	33637		Noupoi Island	Amphlett Is	(9°15’S 150°47’E). Phenocrysts - plag (An cpx ol; rare opx with reaction rims.	59.44	1	16.48	2.48	3.33	0.08	3.55	6.06	4.34	1.93	0.21	0.41	0.64	0.02	99.97	1.23	473.31	574	24.78	40	611.52	612	10.39	14	5.34	2	1.17	1	141.77	168	6.05	5	4.19	0.52	19.10	17	41.28	23	36.86	50	4.79	20.45
638	87	Andesite	33638		Wata Island	Amphlett Is	(9°19’s 150°52’E). Phenocrysts - ol. Grouridmass — cpx plag; very fine.	59.55	0.75	14.58	2.65	2.93	0.08	6.64	4.92	4.2	2.05	0.2	0.47	0.85	0	99.87	1.05	569.81	707	27.22	47	650.32	667	10.78	15	5.83	4	1.21	1	132.38	160	4.72	4	4.08	0.38	22.25	23	51.80	40	44.54	36	6.44	27.51
639	120	Dacite	33639		Yabwaia Island	Amphlett Is	(9°17’s 150°47’E). Pheno crysts - plag (An cpx opx hblde biot. Fine	59.98	1	14.47	2.18	3.19	0.08	5.45	4.82	3.98	2.99	0.32	0.5	0.53	0.06	99.55	3.41	814.28	1014	41.43	75	887.37	929	25.74	34	14.22	11	3.29	4	177.32	218	8.28	7	5.39	0.94	18.00	16	58.53	46	66.22	56	8.05	32.71
640	105	Dacite			Watota Island	Amphlett Is	(9Ol8ts 150 Phenocrysts — plag (An cpx opx hblde. Feldspathic groundmass.	60.84	0.79	14.8	1.71	3.46	0.09	5.71	5.11	3.89	2.57	0.29	0.4	0.29	0.05	100			864		60		657		21		7		1		198		6				13		31		56
641	95	Dacite	33641		Wagabu Island	Amphlett Is	(9°20’S 150°41’E). Phenocrysts - plag (An opq (after hblde) cpx opx rare biot. Cpx clusters. Fine groundmass.	63.23	0.69	15.29	1.64	2.08	0.06	3.72	3.81	4.19	4.02	0.28	0.84	0.41	0.07	100.33	4.22	1010.07	1266	58.82	105	862.29	895	28.04	39	19.60	16	4.15	4	209.58	253	6.79	6	6.27	0.62	13.23	11	62.44	50	75.41	69	8.51	33.60
642	86	Dacite			Urasi Island	Amphlett Is	(9°13’s 150°52’E). Phenocrysts — plag (An opx cpx hblde. Fine feldspathic groundmass.	64.29	0.62	16.2	2.48	1.41	0.05	2.6	3.87	4.56	2.42	0.2	0.52	0.32	0.01	99.55			804		62		668		17		4		1		167		5				21		45		57
643	79	Basalt	33643	boulder	Kukuia Peninsula	Moresby St Area	(9°37’S 150°28’E). Phenocrysts - ol plag (An opq. Groundinass - plag cpx ol opq.	64.45	0.6	16.08	1.91	1.92	0.09	3.05	4.13	4.54	2.49	0.22	0.31	0.34	0.03	100.16	1.10	709.91	943	34.52	62	617.34	651	12.09	17	7.60	5	1.54	2	155.20	189	5.72	5	4.71	0.52	21.03	20	51.93	41	56.54	69	6.97	28.64
644	133	Basalt	33644	boulder	Kukuia Peninsula	Moresby St Area	(9°37’S 150°28’E). Slightly porphyritic. Phenocrysts - plag (An ol	64.82	0.64	15.21	1.94	1.67	0.04	3.13	3.65	4.38	3.49	0.26	0.43	0.52	0.06	100.24	3.48	921.08	1161	54.26	99	872.50	914	26.45	38	15.24	15	3.77	4	166.20	205	5.06	4	5.19	0.48	13.37	11	55.60	44	60.67	58	7.53	30.10
645	155	Basalt	33645	boulder	Goodenough Island	Moresby St Area	(9°22’S l50°21’E). Phenocrysts - ol cpx plag (An Fine feldspathic groundmass.	47.51	1.64	15	2.39	6.41	0.15	11.77	9.37	3.4	0.52	0.37	0.48	0.46	0.23	99.7	0.94	272.42	388	8.63	13	597.85	657	1.02	1	1.67	0	0.38	1	162.48	188	3.93	3	4.17	0.37	30.20	27	37.26	16	35.78	21	5.16	24.11
646	154	Basalt	33646	recent cones	Bwaido Peninsula	Moresby St Area	(9°28’S l50°24’E). Phenocrysts — ol minor cpx. Fine feldspathic groundmass.	47.91	2	17.13	2.9	6.28	0.15	7.69	10.03	3.89	0.48	0.37	0.44	0.29	0.23	99.79	0.13	163.42	154	3.75	5	466.47	463	1.33	9	1.03	0	0.24	20	170.51	205	3.12	4	4.55	0.30	30.25	28	32.02	12	30.41	48	4.67	22.56
647	203	Basalt	33647		Bwaido Peninsula	Moresby St Area	(9°28’S 150°22’E). Phenocrysts - play (An ci cpx. Groundmass — play cpx ol opq.	49.39	1.43	15.53	3.03	5.11	0.13	9.76	9.34	3.16	0.98	0.76	0.42	0.38	0.03	99.45	0.18	411.67	549	6.67	11	663.38	675	4.12	5	3.15	0	0.38	0	133.26	161	5.14	3	3.70	0.41	22.93	22	42.92	25	47.57	50	6.55	29.25
648	68	Basaltic andesite	33648	float	lamalele Area	Moresby St Area	(9°30’S 150°31’E). Phenocrysts — play (An cpx ol.Groundmass - play opq cpx.	50.28	1.11	15.62	3.77	3.94	0.14	10.06	9.22	3.44	1.24	0.52	0.22	0.14	0.06	99.76	0.10	589.24	740	12.89	23	842.19	856	6.19	9	6.63	6	0.95	1	138.19	170	4.92	4	3.88	0.36	23.18	21	54.83	40	66.42	71	8.70	37.10
649	49	Basaltic andesite	33649	boulder	lamalele Area	Moresby St Area	(9°30’S 150°32’E).	50.47	1.64	19.21	4.33	2.54	0.11	4.59	8.91	3.76	1.58	0.51	1.27	0.78	0.12	99.82	0.80	531.06	680	21.12	36	863.60	843	5.25	7	4.20	2	0.97	1	156.45	184	7.33	5	4.27	0.58	23.69	21	45.26	28	51.28	39	6.89	30.49
650	199	Basaltic andesite	33650		lamalele Area	Moresby St Area	(9°29’S 150°31’E).Phenocrysts — ol cpx. Groundmass - play cpx opq glass.	52.8	1.25	18	2.43	4.4	0.13	5.01	9.17	3.8	1.27	0.39	0.37	0.42	0	99.44	0.49	435.11	579	12.36	23	668.28	666	5.67	13	4.26	3	0.79	0	134.62	161	4.98	5	3.91	0.41	22.75	22	42.09	26	43.90	47	5.79	25.54
651	191	Basaltic andesite	33651		Wagipa Island	Moresby St Area	(9°30tS 150°23’E).Phenocrysts - play (An ci cpx; some clusters.Groundmass - play cpx opq glass.	53	1.18	16.57	4.39	2.75	0.1	5.19	7.71	3.93	1.78	0.41	1.01	1.22	0.08	99.32	1.39	583.32	743	25.10	42	599.07	599	8.43	15	6.63	5	1.38	0	203.54	243	6.62	7	5.65	0.51	26.14	23	50.91	34	57.43	62	7.40	31.70
652	198	Basaltic andesite	33652		Wagipa Island	Moresby St Area	(9°30’S 150°23’E).Phenocrysts — plag (An ol cpx. Very fineyroundinass.	53.53	1.43	14.17	2.32	3.91	0.11	6.87	9.61	2.87	2.33	0.62	0.53	0.33	0.69	99.32	0.60	888.59	1088	30.99	53	1366.87	1346	10.89	15	19.18	15	2.86	2	359.48	428	7.28	6	11.07	0.53	21.25	20	196.49	207	284.48	311	28.48	94.86
653	62	Basaltic andesite	33653	recent flow	Mud Bay	Moresby St Area	(9°24’s l50°21’E). Vesicular. Phenocrysts — plag (An ci cpx. Groundmass — play cpx glass.	53.6	1.08	18.51	2.45	5.3	0.14	3.99	8.28	3.43	1.66	0.31	0.55	0.21	0.01	99.52	0.29	459.14	582	10.99	20	938.43	941	6.13	8	3.64	1	0.59	0	140.48	174	3.43	4	4.42	0.25	20.58	19	39.88	22	39.71	39	5.52	24.87
654	64	Basaltic andesite	33654		Wagipa Island	Moresby St Area	(9°30’S 150°23’E). Phenocrysts — play (An ol cpx. Groundmass — play cpx opq interstitial material.	53.7	1.67	17.15	2.34	5.4	0.14	3.99	8.3	3.97	1.53	0.34	0.66	0.34	0.26	99.79	1.72	504.09	596	22.07	38	485.26	493	7.82	11	5.44	4	1.51	1	182.01	219	5.52	4	5.35	0.55	31.39	29	43.20	24	47.87	52	6.74	31.00
655	76	Basaltic andesite	33655	float	Wagipa Island	Moresby St Area	(9°30’S 150°23’E). Phenocrysts - play (An cpx ol.Groundmass — play cpx opq. Some phenocryst clusters.	53.88	1.15	15.82	1.07	6.03	0.13	7.35	7.97	3.54	1.67	0.34	0.49	0.19	0.02	99.65	1.33	497.47	619	22.77	40	604.41	608	7.80	11	7.05	6	1.48	2	154.77	188	6.77	6	4.71	0.56	23.14	22	48.32	32	53.65	61	6.85	29.26
656	55	Basaltic andesite	33656	recent cones	Bwaido Peninsula	Moresby St Area	(9°28’s 150°24’E). Sparsely porphyritic. Phenocrysts - plag (An minor cpx ol opq. Groundmass - plag cpx opq.	53.97	0.96	16.51	2.11	5.69	0.14	5.62	9.45	2.92	1.25	0.29	0.6	0.14	0.09	99.74	0.37	431.25	551	11.29	20	865.25	867	6.42	9	3.91	1	0.71	0	112.62	140	2.72	1	3.61	0.22	18.03	17	39.38	22	37.88	44	5.13	23.46
657	57	Basaltic andesite	33657	boulder	Kukuia Peninsula	Moresby St Area	(9°37’s 150°31’E). Phenocrysts - play (An cpx ol. Groundinass — play cpx ol (altered) opq interstitial material.	54.22	1.02	17.62	1.79	5.87	0.14	4.51	9.02	3.09	1.32	0.3	0.44	0.17	0	99.51	0.37	461.29	582	11.00	20	907.32	922	6.90	9	4.03	1	0.71	1	118.07	149	2.86	2	3.84	0.26	19.01	23	40.77	22	39.87	44	5.36	24.17
658	72	Basaltic andesite	33658		Kukuia Peninsula	Moresby St Area	(9°35’S 150°29’E). Phenocrysts - play (An cpx ol. Groundmass — play cpx interstitial material.	55.22	1.46	17.66	3.45	3.83	0.13	3.08	6.92	4.36	2.29	0.56	0.31	0.17	0.1	99.54	0.97	786.49	1011	23.29	41	981.02	996	10.77	12	7.64	3	1.78	2	194.36	238	6.59	6	5.31	0.52	26.26	25	54.44	39	68.89	69	9.08	39.33
659	166	Basaltic andesite	33659	float	Kukuia Peninsula	Moresby St Area	(9°36’S 150°31’E). Phenocrysts - play (An cpx ol. Groundmass — play cpx ol opx opq interstitial material.	55.44	1.17	17.8	1.95	4.06	0.11	3.61	7.67	4.08	1.84	0.31	0.84	0.28	0.41	99.57	1.26	466.50	586	21.94	39	582.95	577	7.00	13	5.21	5	1.04	0	160.65	191	5.33	5	4.74	0.43	29.76	19	48.34	23	42.35	47	6.28	27.67
660	178	Basaltic andesite	33660	float	lamalele Area	Moresby St Area	(9°29’S 150°31’E)Phenocrysts — ol cpx rare play (An Groundmass — play cpx opq ol (altered). 01 - cpx clusters common.	55.45	1.18	17.84	2.49	3.84	0.11	3.93	7.71	4	1.67	0.3	0.91	0.33	0.08	99.84	1.11	464.80	586	19.74	36	597.17	594	7.10	13	5.10	5	1.02	1	160.85	189	5.30	5	4.65	0.46	22.34	21	40.85	23	40.55	50	5.24	23.23
661	173	Basaltic andesite	33661	boulder	Kukula Peninsula	Moresby St Area	(9°37’s 150°31’E).Phenocrysts — play (An cpx ol. Groundmass -	55.86	1.18	17.89	2.41	3.79	0.1	3.84	7.29	4.08	1.78	0.31	0.95	0.43	0.09	100	1.29	456.74	581	24.04	40	581.50	578	7.37	14	5.24	0	1.06	1	163.78	190	5.34	5	4.76	0.44	26.44	27	44.23	29	40.65	47	5.68	25.55
662	196	Andesite	33662		Kukuia Peninsula	Moresby St Area	(9°36’S	56.16	0.96	14.7	3.08	3.27	0.11	6.89	8.31	3.09	2.13	0.43	0.35	0.2	0.03	99.71	0.61	792.90	995	25.20	43	928.07	946	8.97	13	9.54	6	1.54	1	210.21	257	4.17	4	6.51	0.33	24.27	28	106.74	104	106.84	114	15.12	56.91
663	165	Andesite	33663	float	Kukuia Peninsula	Moresby St Area	(9°36’s 150°31’E) Phenocrysts - play (An cpx ol Groundmass -play cpx opq	56.2	1.15	17.56	1.58	4.31	0.12	3.85	7.5	4.22	1.69	0.28	0.57	0.19	0.23	99.45	1.19	459.52	584	22.42	38	582.11	580	7.18	14	5.13	5	1.04	0	160.69	190	5.25	6	4.66	0.45	21.13	19	40.50	21	39.93	37	5.16	22.83
664	172	Andesite	33664	float	lamalele		Area (9°29’S 150°31’E). Sparsely porphyritic. Phenocrysts - ol cpx. Ground-mass - play opq	56.3	1.16	17.65	2.36	3.93	0.11	3.8	6.82	4.26	1.78	0.32	0.71	0.32	0.16	99.68	0.93	491.82	670	22.91	35	543.14	560	9.01	17	5.43	5	3.22	3	167.10	196	5.52	5	4.86	0.43	24.77	23	44.22	29	45.21	56	5.82	25.17
665	174	Andesite	33665	float	Kukuia Peninsula		(9°36’S 150°31’E).Phenocrysts - play (An cpx ol. Groundmass -play GpX ol (altered) opq.	56.54	1.15	17.85	2.89	3.19	0.12	3.51	6.73	4.36	1.72	0.31	0.62	0.32	0.09	99.4	1.02	514.24	691	24.74	37	551.96	561	7.46	14	5.34	0	1.08	1	166.31	193	5.34	5	4.88	0.52	64.90	60	53.81	40	48.69	56	7.17	32.16
666	197	Andesite	33666		lamalele Area		(9°29’S 150°31’E). Pheno—crysts — ol cpx opq. Groundmass — plag opq glass.	56.97	1.15	17.61	2.89	3.26	0.09	3.33	6.44	3.69	2.67	0.48	0.76	0.37	0.13	99.84	0.85	906.03	1173	36.74	57	1147.89	1178	12.24	19	12.83	11	2.13	0	266.36	307	5.61	5	8.06	0.59	58.24	54	153.50	162	150.69	166	22.70	84.22
667	175	Andesite	33667		Wagipa Island		(9°30’S 150°23’E). Smallphenocrysts cpx ol. Groundmass — plag cpx opq.	57.01	1.13	17.61	2.32	3.59	0.11	3.72	6.96	4.17	1.66	0.28	0.73	0.48	0.02	99.79	1.13	484.72	612	24.52	39	561.67	571	7.59	9	5.28	3	1.10	1	165.68	197	5.37	4	4.92	0.62	30.34	28	48.79	33	47.34	54	6.33	27.44
668	195	Andesite	33668		northern Goodenough			57.26	1.04	16.6	2.89	3.07	0.1	4.12	6.84	3.58	2.63	0.44	0.65	0.52	0.09	99.83	0.82	900.51	1164	37.59	58	1059.35	1087	11.66	19	12.52	13	2.06	0	260.88	297	5.25	6	7.96	0.49	58.15	53	135.12	138	131.91	146	19.26	72.76
669	59	Andesite	33669		Bwaido Peninsula			57.45	1	14.52	2.78	2.62	0.09	5.85	7.59	3.35	2.59	0.44	0.93	0.25	0.05	99.51	0.83	911.82	1145	25.42	38	1231.68	1241	12.35	16	8.60	4	1.88	2	191.95	224	5.38	5	5.95	0.61	18.32	16	59.64	42	72.91	73	9.12	39.14
670	77	Andesite	33670	float	Kukuia Peninsula		(9°34’s l50°29’E).Phenocrysts - play (An cpx hblde (with opq rims) biot (altered to opq). Grounc — plag cpx opq.	57.67	0.69	14.65	2.27	4.29	0.12	7.16	7.11	3.14	1.68	0.2	0.41	0.33	0.05	99.77	1.69	473.61	576	27.51	39	642.94	650	11.68	12	5.63	3	1.22	1	107.16	130	3.62	2	3.83	0.50	43.06	40	53.97	39	37.63	41	6.76	29.75
671	52	Porphyritic andesite	33671	float	Kukuia Peninsula		(9°37tS 150°28’E).Phenocrysts - opx	60.29	1.15	16.54	2.54	2.55	0.12	2.64	4.03	5.19	3.14	0.46	0.6	0.23	0.01	99.49	2.53	845.85	995	56.90	85	498.83	505	17.84	19	12.78	10	2.90	3	326.01	380	11.36	9	9.40	1.11	35.56	33	69.67	56	91.42	99	11.67	47.87
672	180	Andesite	33672		Bwaido Peninsula		(9°29’S 150°21’E). Pheno— crysts - play (An hblde blot opq. Very fine feldspathic groundmass.	61.55	0.79	16.45	2.43	2.21	0.08	2.84	4.94	4.36	2.66	0.26	0.73	0.6	0.08	99.98	1.35	669.87	822	50.32	76	540.57	549	11.87	19	9.24	11	1.91	3	192.51	220	6.64	6	5.67	0.73	77.72	73	103.55	101	103.97	122	20.71	91.21
673	156	Dacite	33673	float	Kukuia Peninsula		(9°35’S 150°29’E). Phenocrysts — andesine cpx opx hblde (opq rims) opq.	64.63	0.87	16.02	2.95	1.46	0.09	1.51	4.02	4.6	2.76	0.27	0.23	0.62	0.03	100.06	1.26	691.39	825	47.00	71	469.07	486	12.09	16	10.08	9	2.18	2	172.36	201	6.57	4	5.25	0.72	31.82	30	64.82	52	53.77	65	8.34	33.33
674	67	Dacite	33674	float	Kukuia Peninsula		(9°35’S 150°29’E). Phenocrysts - oligoclase hblde opq.	65.99	0.71	16.72	1.82	1.34	0.1	0.94	2.03	5.56	4.14	0.25	0.5	0.26	0.03	100.39	2.84	964.08	1185	68.41	107	290.81	309	18.56	22	18.03	18	4.03	4	388.41	461	11.16	10	10.39	1.12	26.46	25	67.57	57	85.09	79	9.67	36.15
[truncated: 26 more columns]
